# Supplementary material for: Supervised machine learning reveals introgressed loci in the genomes of Drosophila simulans and D. sechellia
Source: PubMed Central journal article supplement (PMC5933812; doi:10.1371/journal.pgen.1007341), 2018-04-23

Figure S4

$$T_D = 0.25 \times 4N$$

A

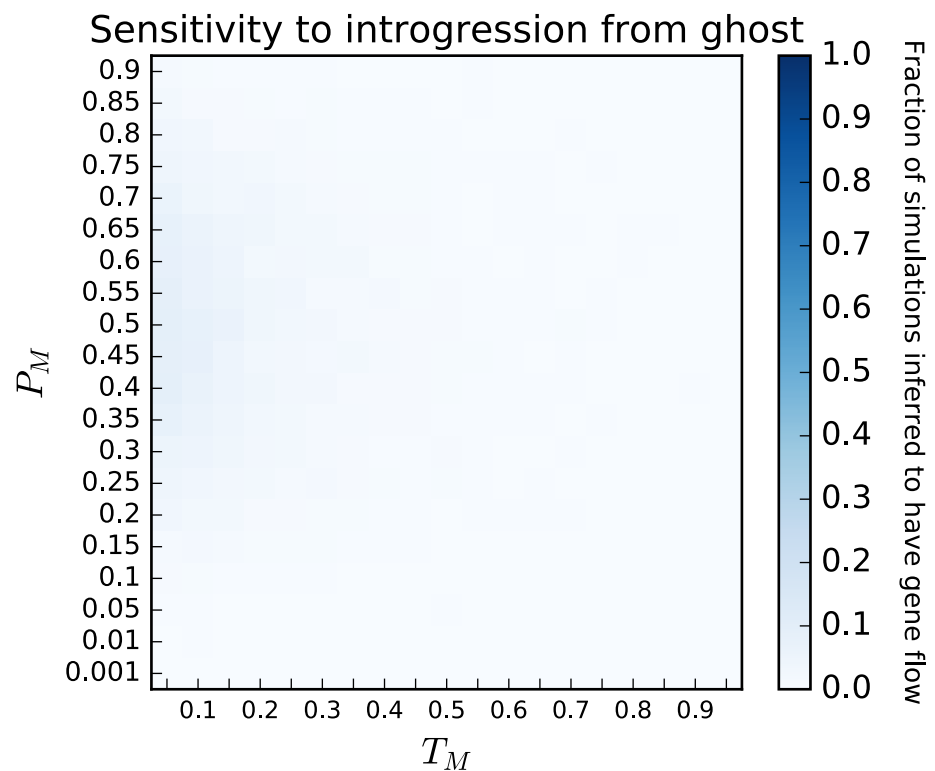

$$T_D = 1 \times 4N$$

B

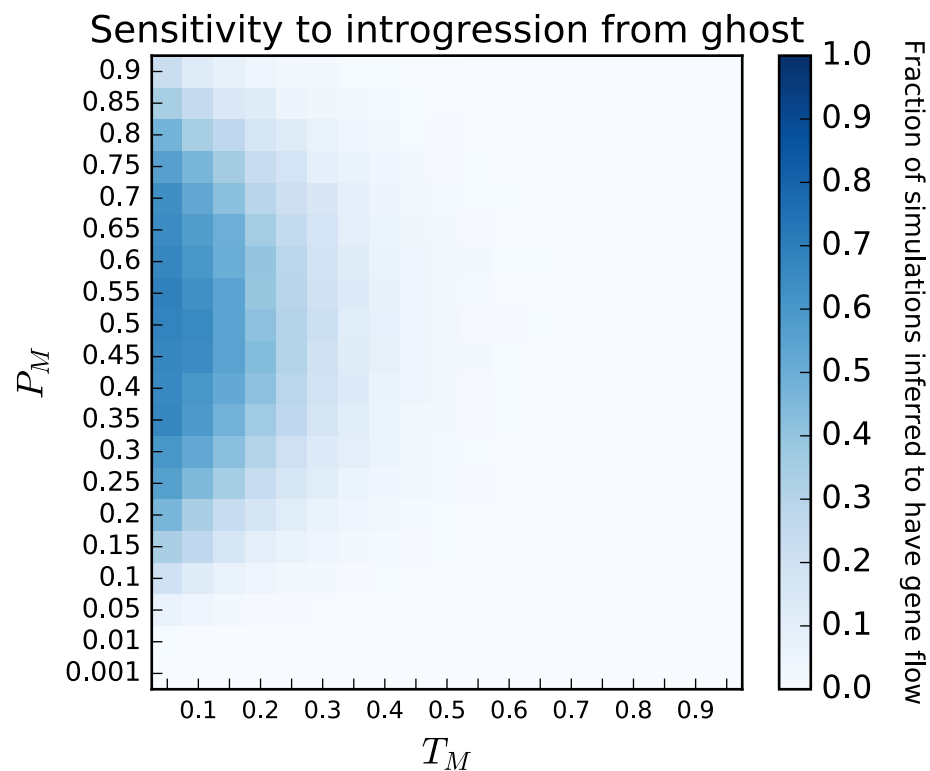

$$T_D = 4 \times 4N$$

C

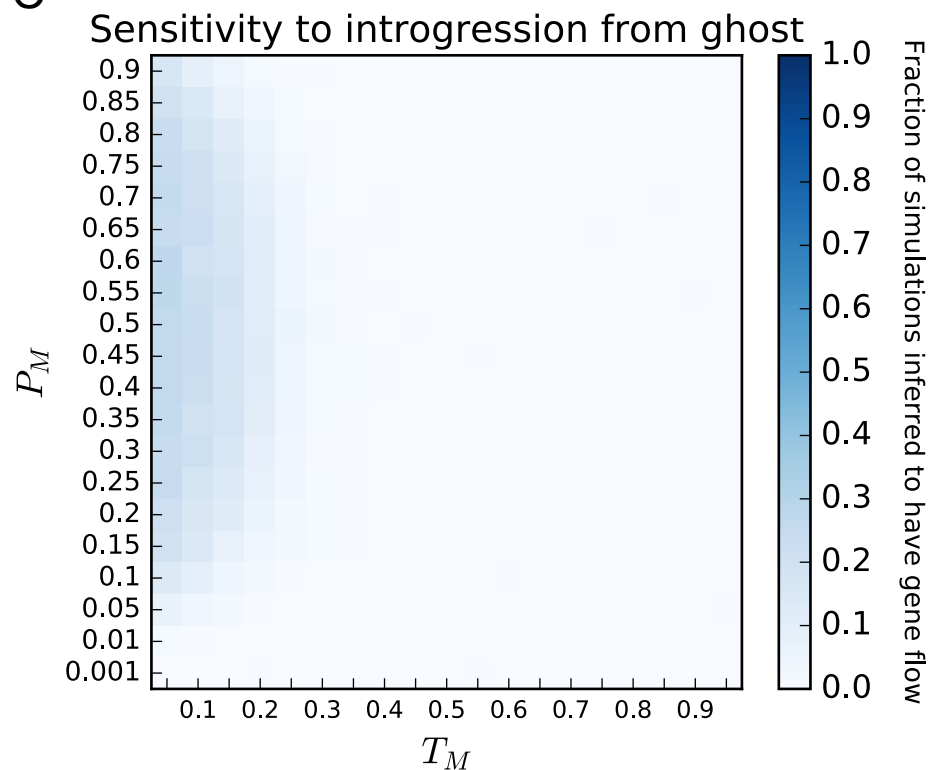

$$T_D = 16 \times 4N$$

D

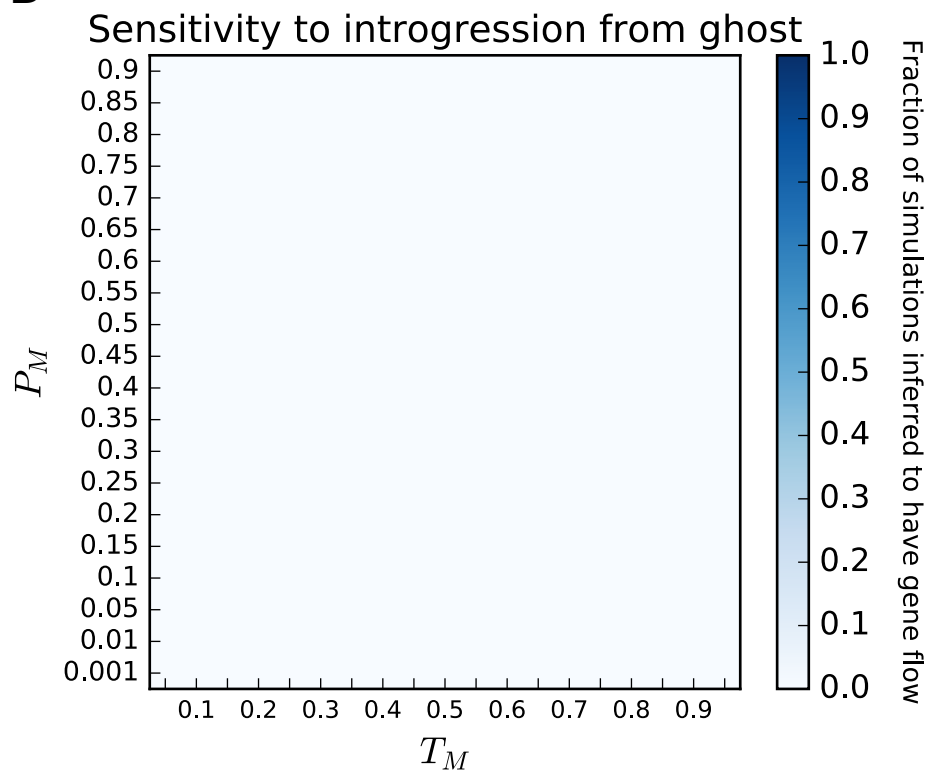

Supplement: pgen.1007341.s004.pdf [file pgen.1007341.s004.pdf]
