# Supplementary material for: Supervised machine learning reveals introgressed loci in the genomes of Drosophila simulans and D. sechellia
Source: PubMed Central journal article supplement (PMC5933812; doi:10.1371/journal.pgen.1007341), 2018-04-23

Figure S8

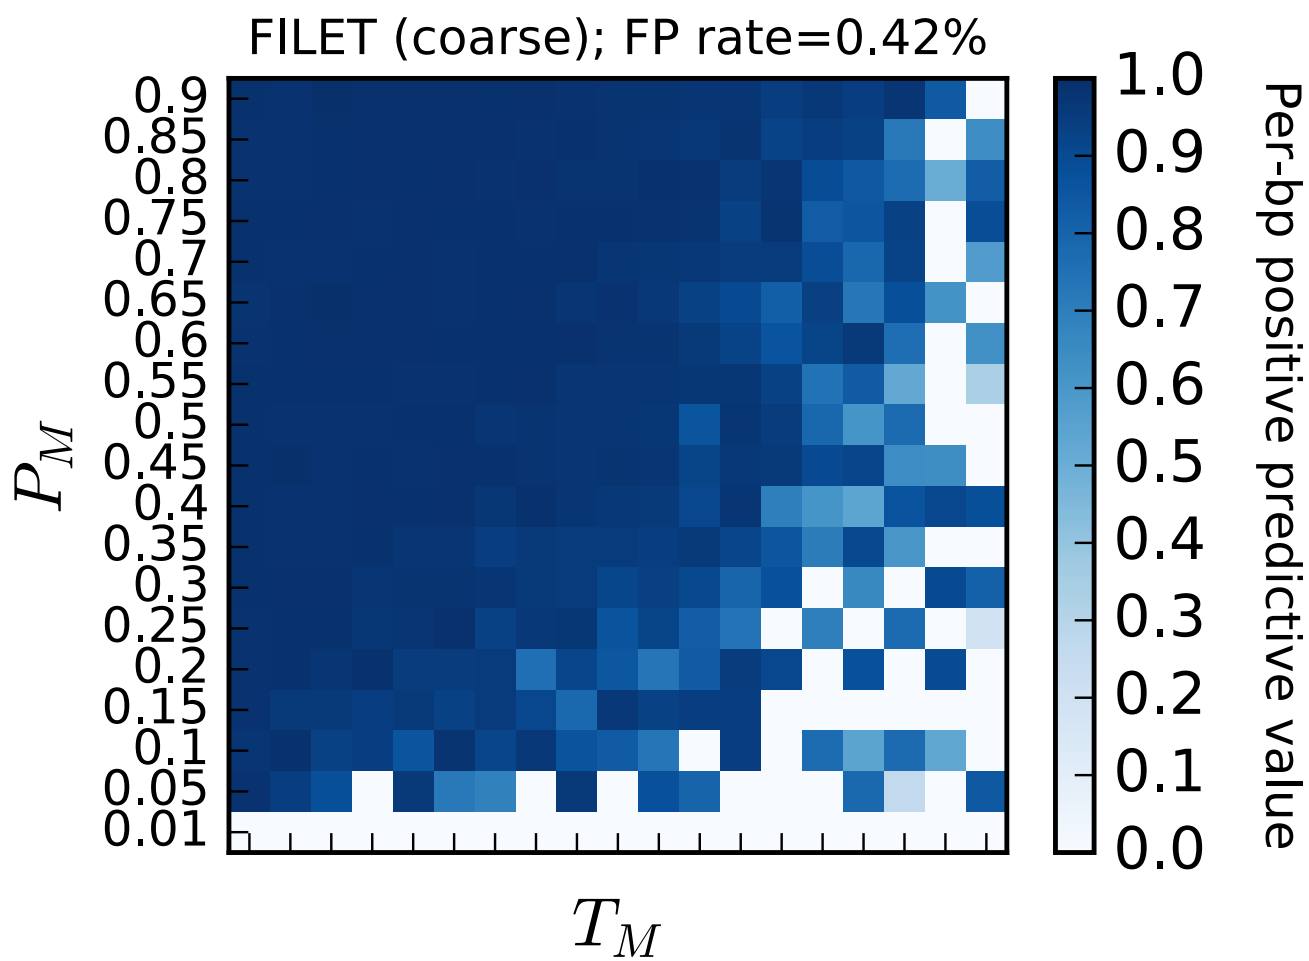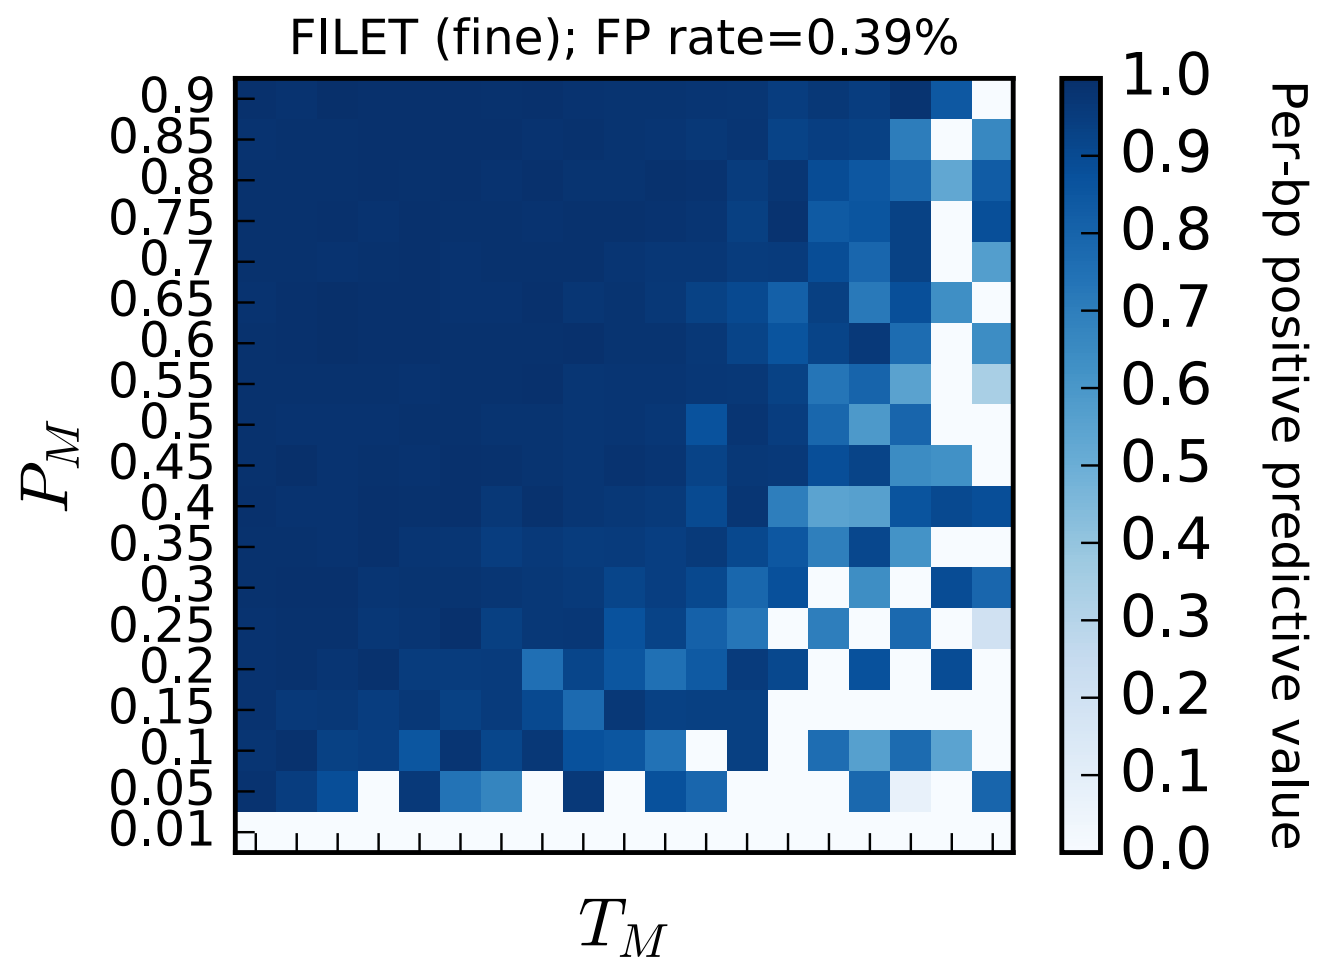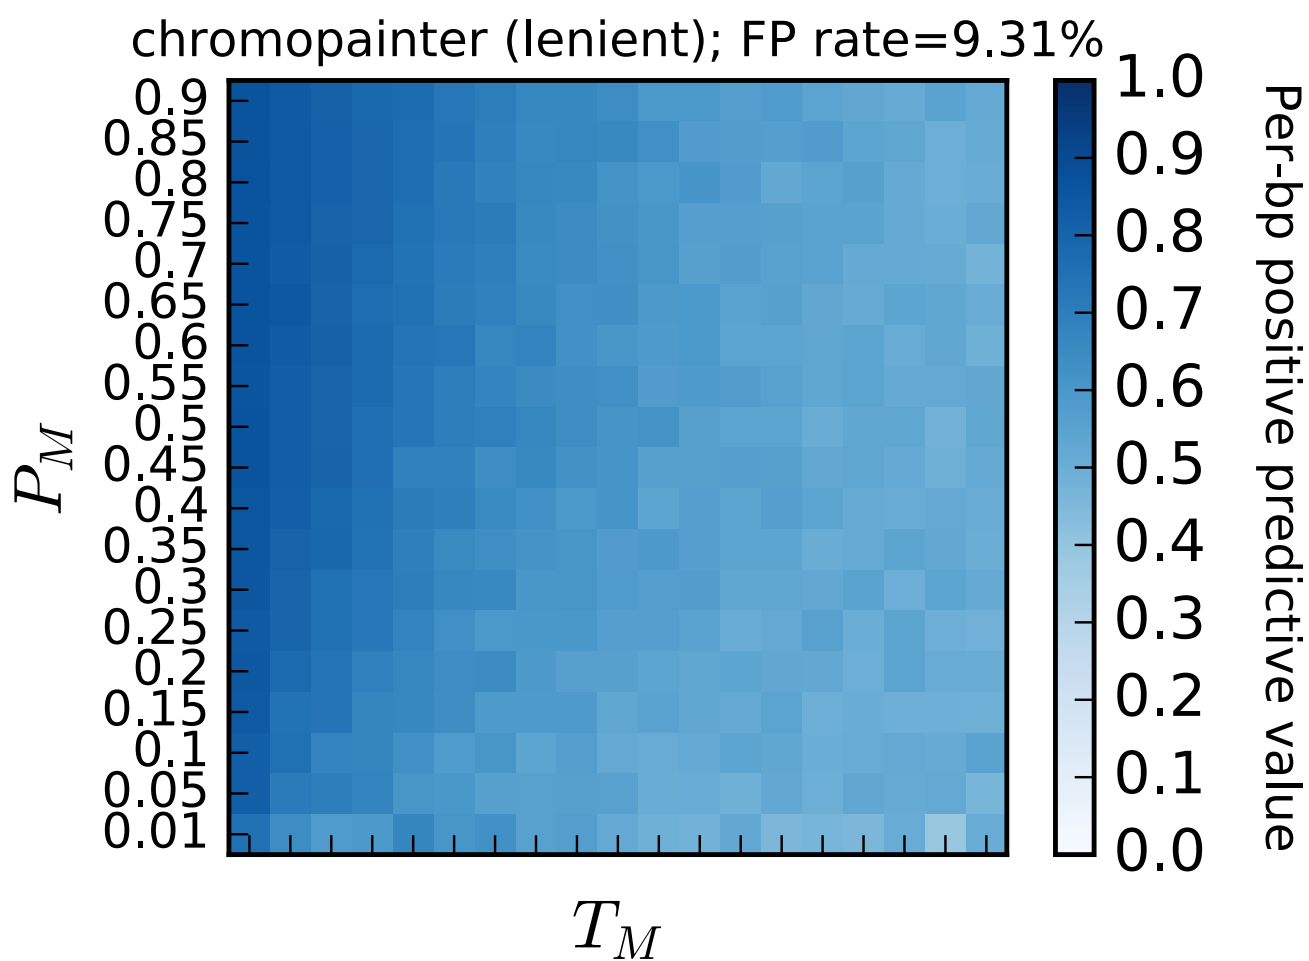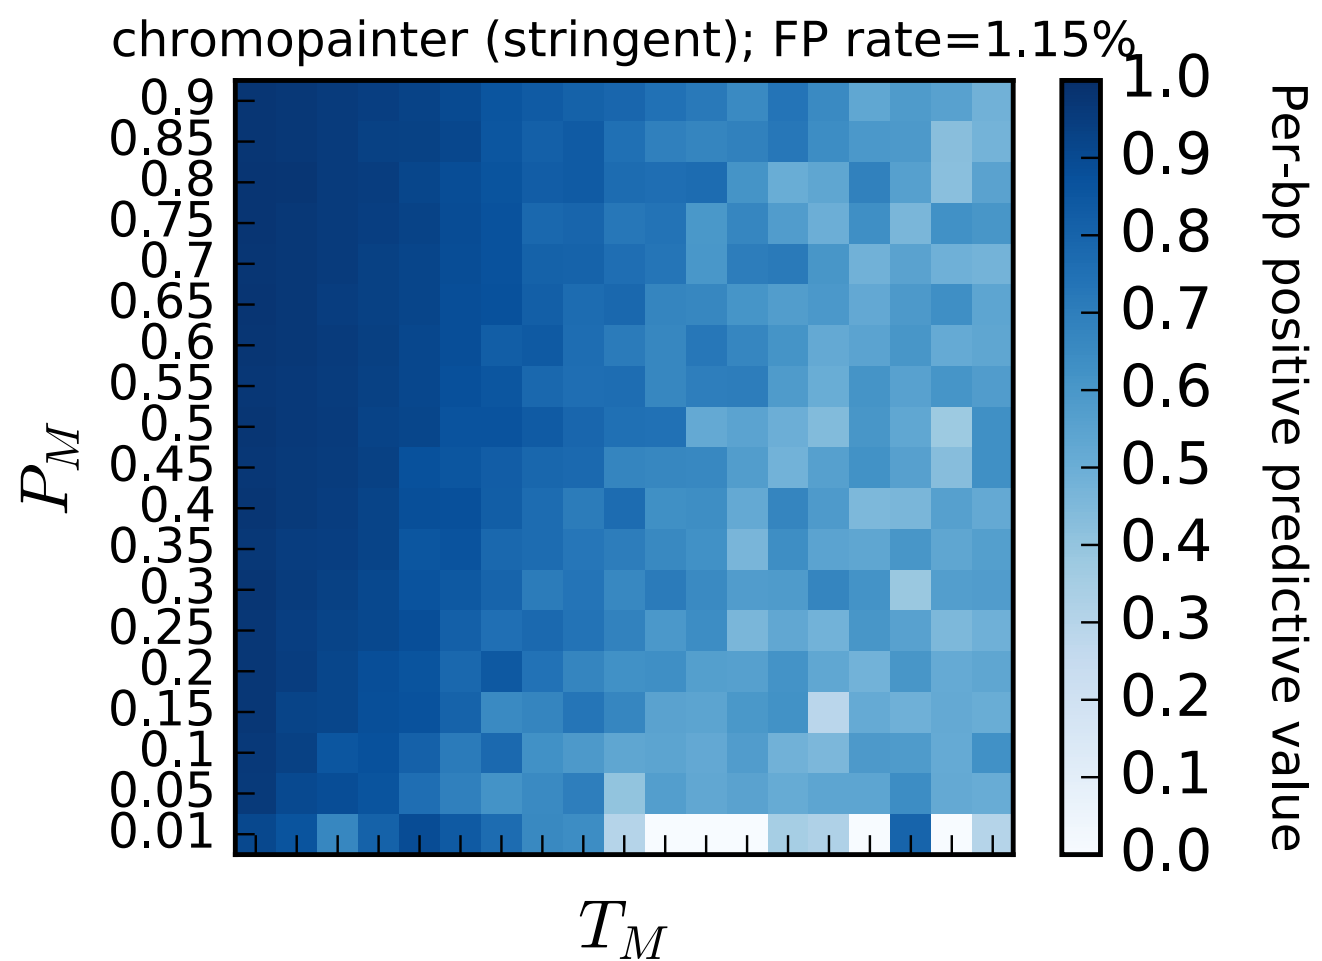

Supplement: pgen.1007341.s008.pdf [file pgen.1007341.s008.pdf]
