# Supplementary material for: Supervised machine learning reveals introgressed loci in the genomes of Drosophila simulans and D. sechellia
Source: PubMed Central journal article supplement (PMC5933812; doi:10.1371/journal.pgen.1007341), 2018-04-23

Figure S9

A

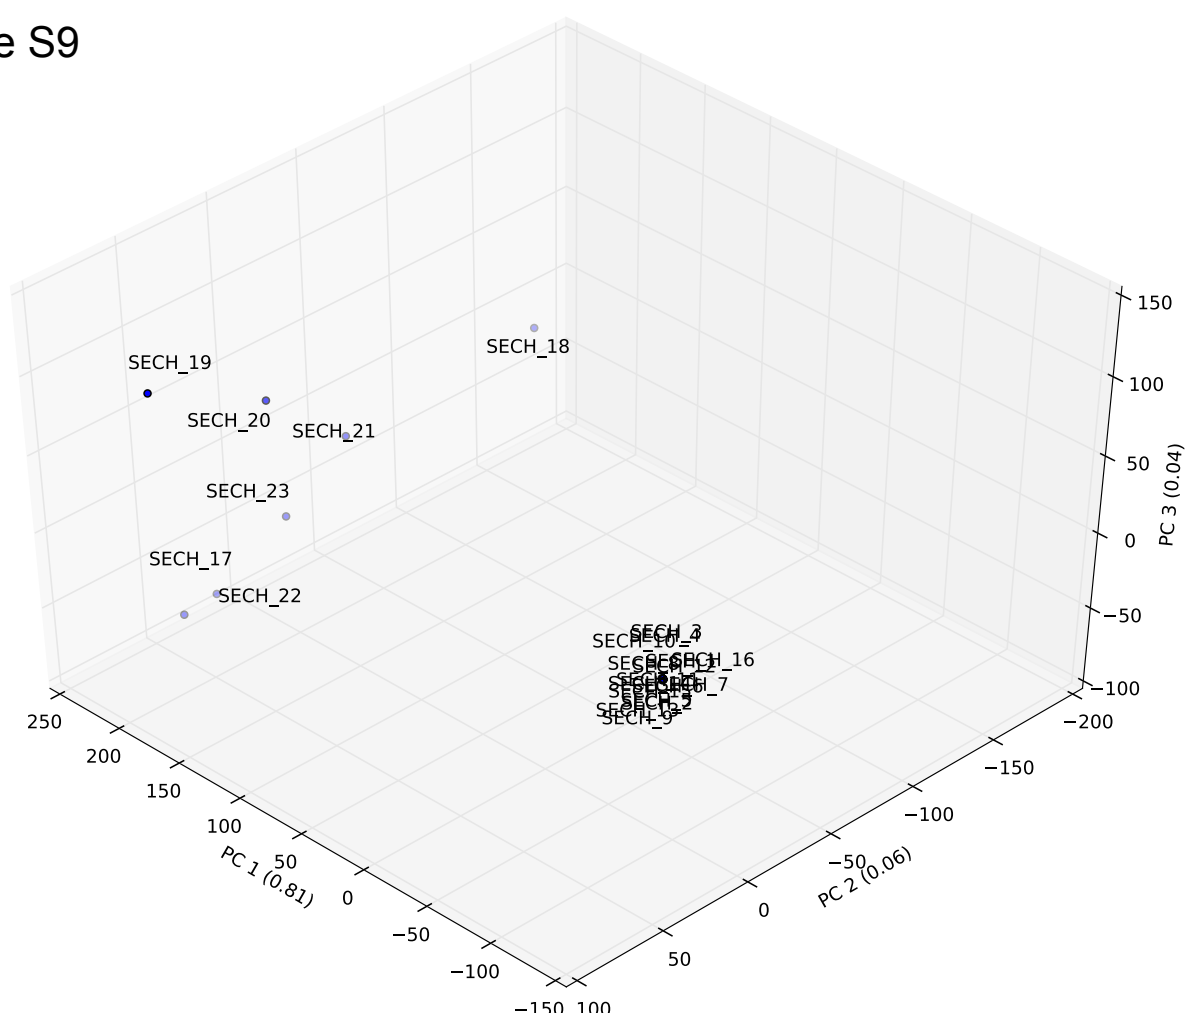

B

K=2

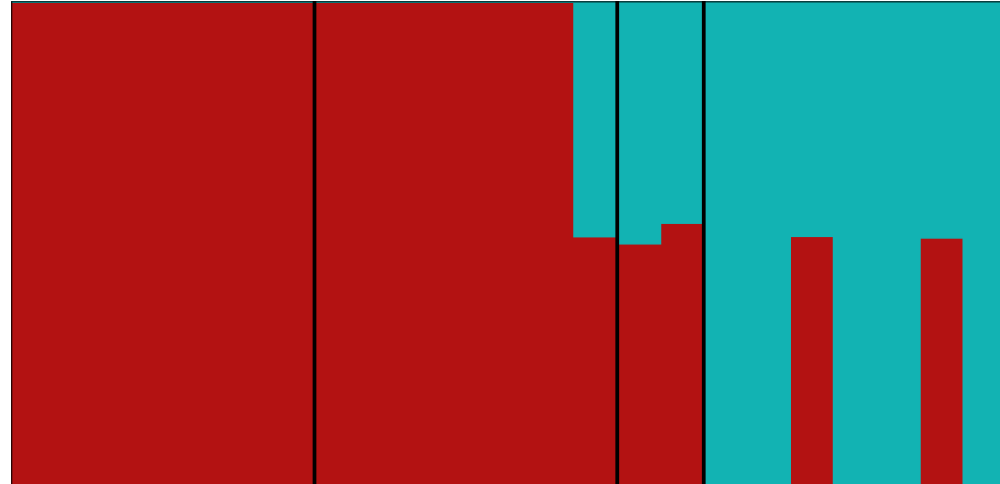

K=3

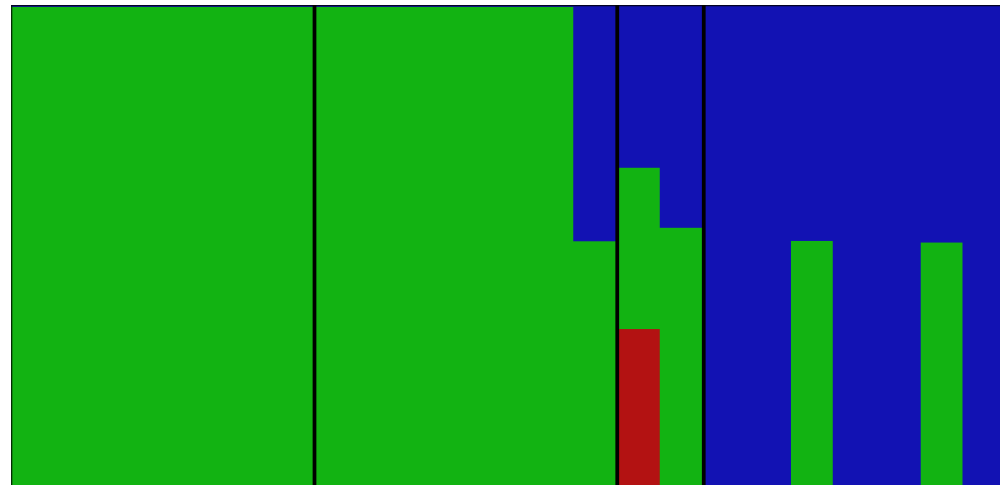

K=4

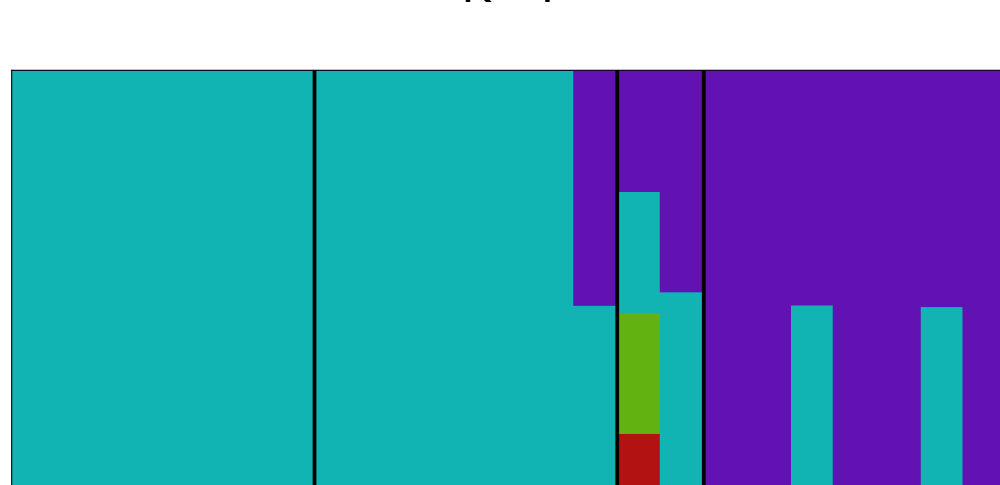

K=5

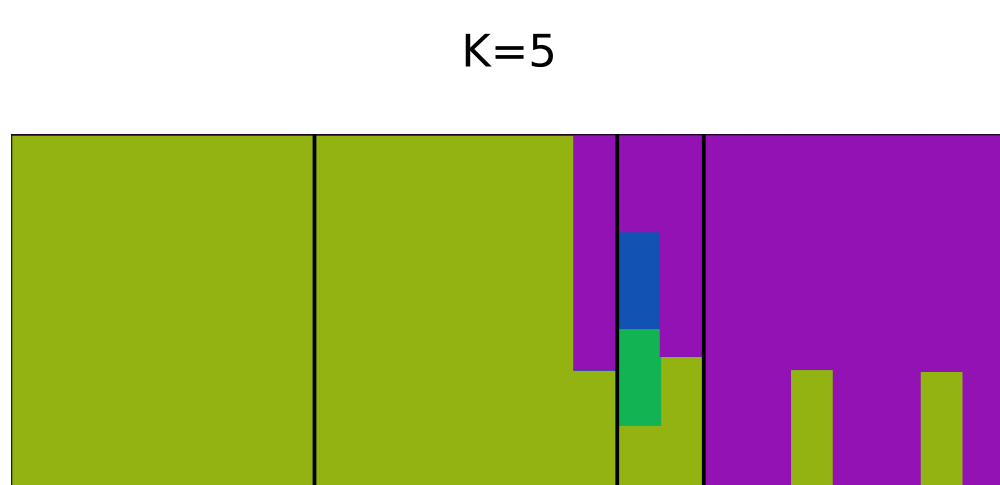

K=6

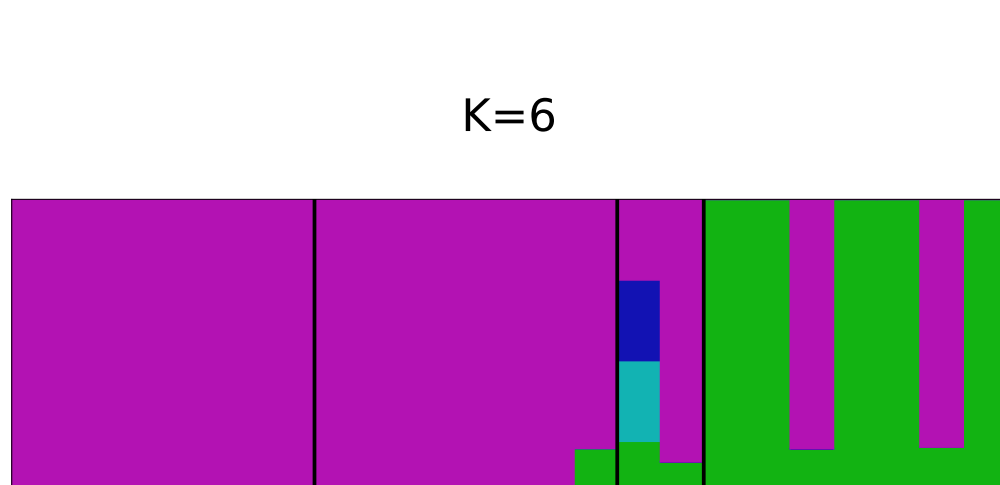

K=7

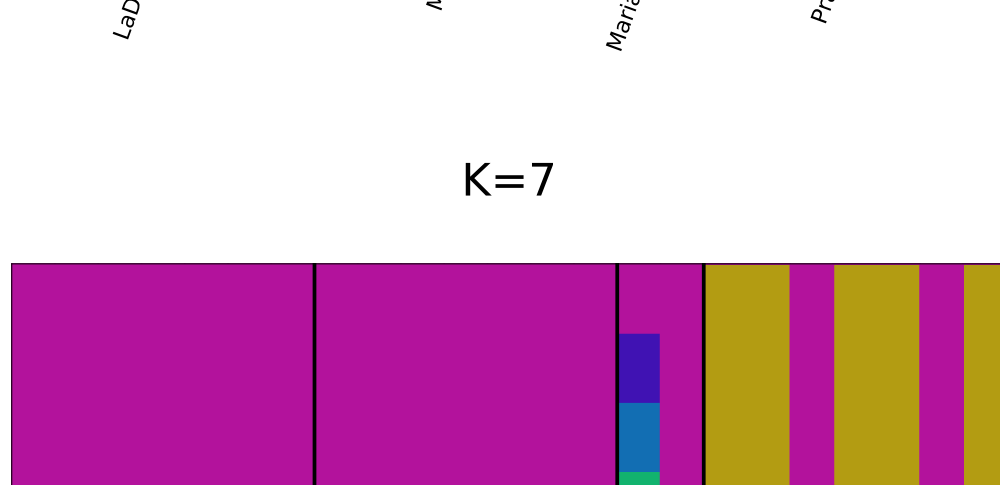

K=8

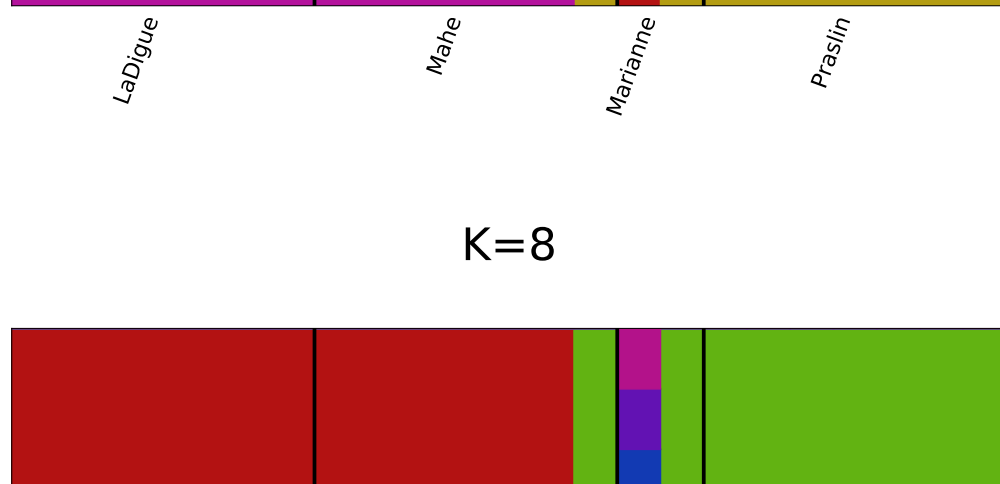

Supplement: pgen.1007341.s009.pdf [file pgen.1007341.s009.pdf]
